# Supplementary material for: Therapeutic effect of F127-folate@PLGA/CHL/IR780 nanoparticles on folate receptor-expressing cancer cells
Source: publisher site journal article supplement (doi:10.3762/bjnano.15.78), 2024-07-31
Supplement: Additional file 1 [file 2190-4286-15-78-S1.pdf]

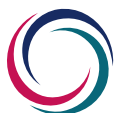

## Supporting Information

for

### **Therapeutic effect of F127-folate@PLGA/CHL/IR780 nanoparticles on folate receptor-expressing cancer cells**

Thi Ngoc Han Pham, Phuong-Thao Dang-Luong, Hong-Phuc Nguyen, Loc Le-Tuan, Xuan Thang Cao, Thanh-Danh Nguyen, Vy Tran Anh and Hieu Vu\_Quang

*Beilstein J. Nanotechnol.* **2024**, *15*, 954–964. [doi:10.3762/bjnano.15.78](https://doi.org/10.3762/bjnano.15.78)

**Additional figures regarding the NMR spectrum of F127-folate, the uptake of nanoparticle to the cancer cell, and the cell viability of CHL to cancer cells**

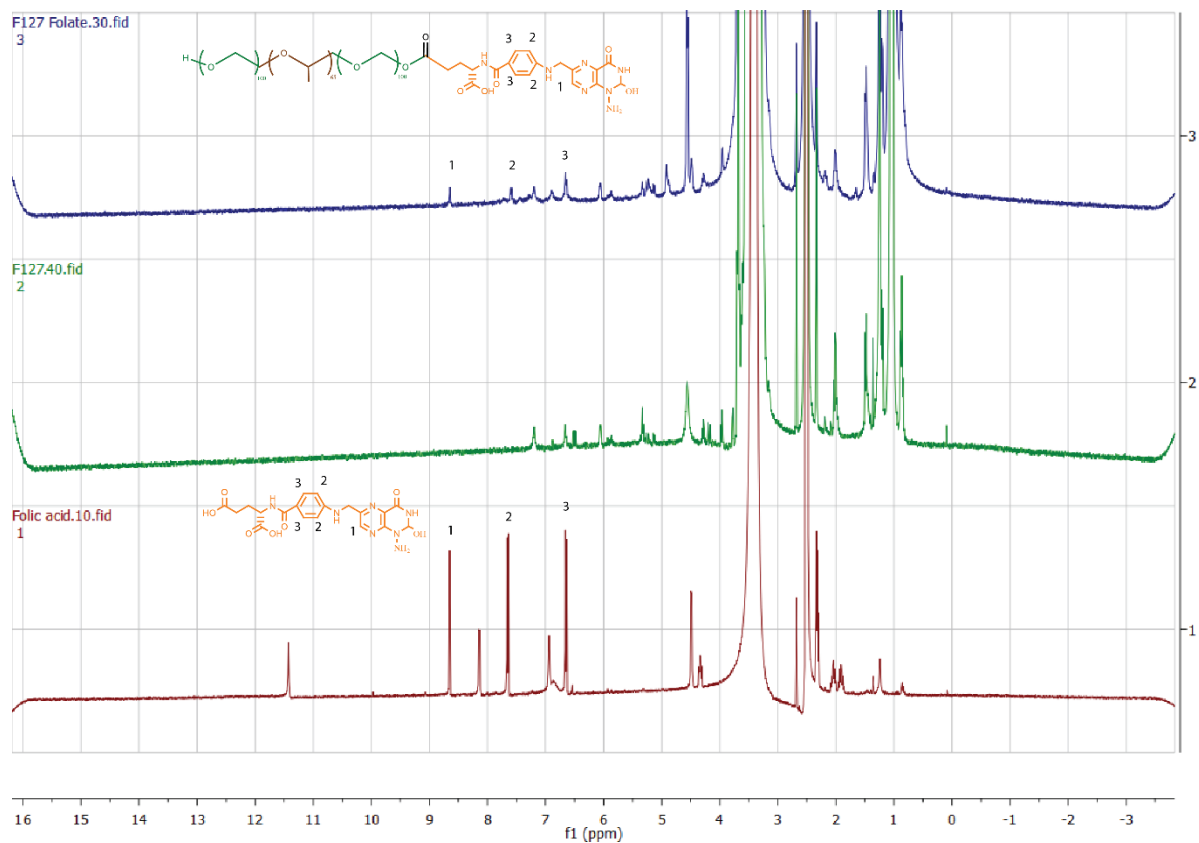

**Figure S1:** The  $^1\text{H}$  NMR spectrum of Folic acid, Pluronic F127 and c. The number show the position of proton in the spectrum.

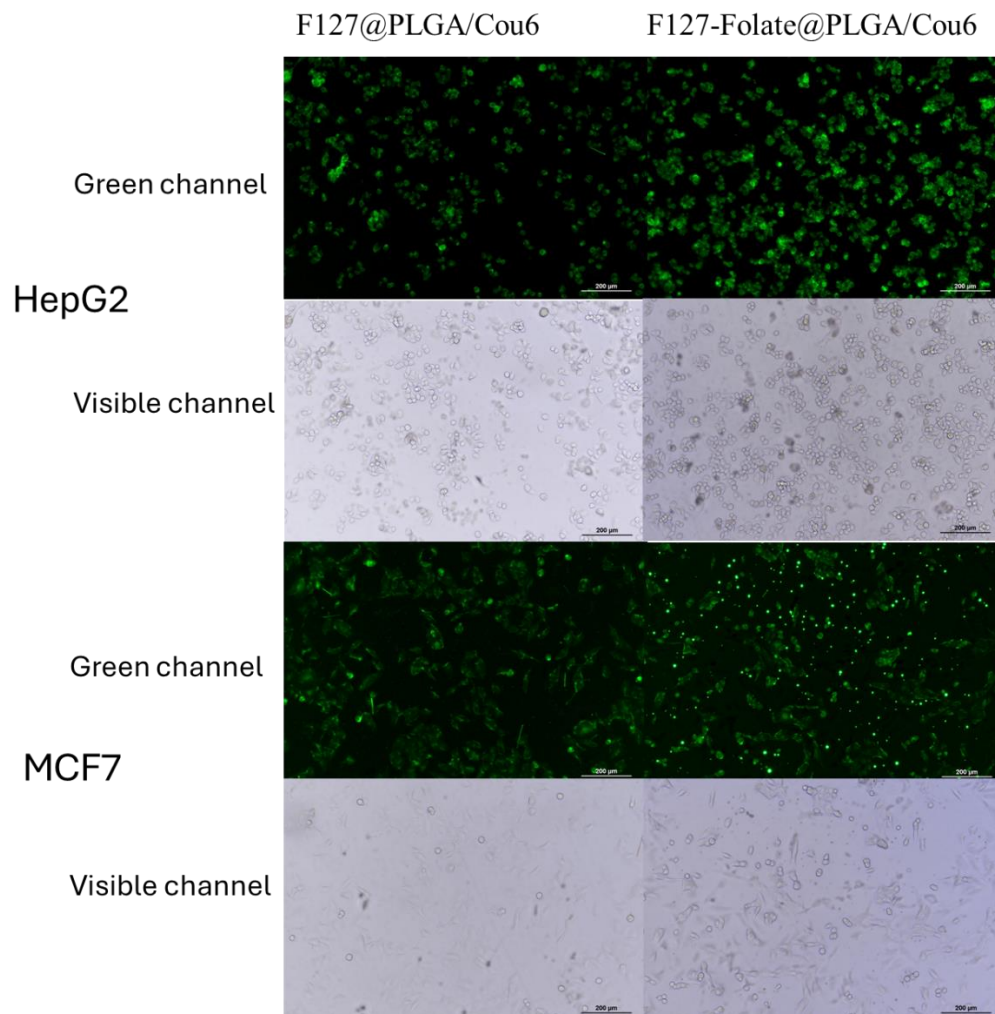

**Figure S2:** The uptake of F127@PLGA/Cou6 and F127-Folate@PLGACou6 to HepG2 and MCF7 after 3 hours of incubation.

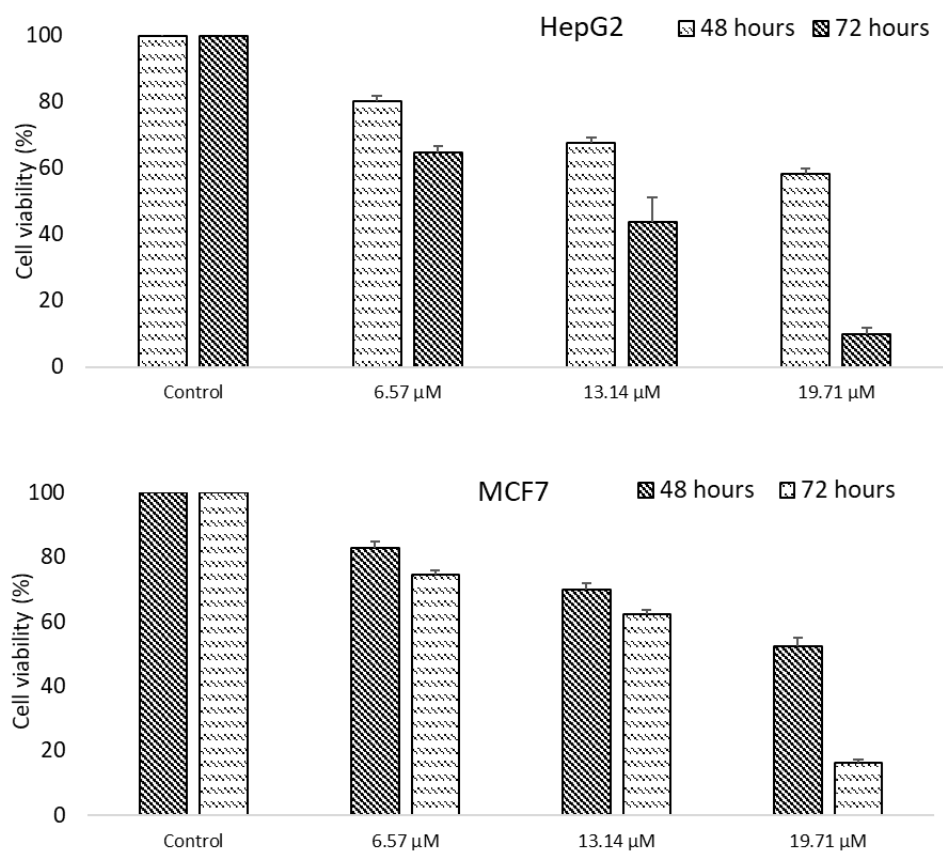

**Figure S3:** Cell viability of HepG2 and MCF7 after treating with chlorambucil at 6.57  $\mu$ M, 13.14  $\mu$ M and 19.71  $\mu$ M in 48 hours and 72 hours.
